# Supplementary material
Source: PubMed Central journal article supplement (PMC1088890)
Supplement: PB012383s01.pdf [file PB012383s01.pdf]

This is an electronic appendix to the paper by Prinzing *et al.* 2001 (The niche of higher plants: evidence for phylogenetic conservatism). *Proc. R. Soc. Lond. B* **268**, 2383–2389.

Electronic appendices are refereed with the text. However, no attempt has been made to impose a uniform editorial style on the electronic appendices.

References from which we compiled our phylogeny.

Alice, L. A. & Campbell, C. S. 1999 Phylogeny of *Rubus* (Rosaceae) based on nuclear ribosomal DNA internal transcribed spacer region sequences. *Amer. J. Bot.* **86**, 81-97. — Backlund, A. & Pyck, N. 1998 Diervillaceae and Linnaeaceae, two new families of caprifolioids. *Taxon* **47**, 657-661. — Bohs, L. & Olmstead, R. G. 1997 Phylogenetic relationships in *Solanum* (Solanaceae) based on *ndhF* sequences. *Syst. Bot.* **22**, 5-17. — Bowe, L. M., Coat, G. & dePampilis, W. 2000 Phylogeny of seed plants based on all three genomic compartments: extant gymnosperms are monophyletic and Gnetales' closest relatives are conifers. *Proc. Natl. Acad. Sci.* **97**, 4092–4097. — Bremer, K. 1994 *Asteraceae: cladistics and classification*. Portland, OR: Timber Press. — Cameron, K. M. *et al.* 1999 A phylogenetic analysis of the Orchidaceae: evidence from *rbcl* nucleotide sequences. *Amer. J. Bot.* **86**, 208-224. — Campbell, C. S., Donoghue, M. J., Baldwin, B. G. & Wojciechowski, M. F. 1995 Phylogenetic relationships in Maloideae (Rosaceae): evidence from sequences of the internal transcribed spacers of nuclear ribosomal DNA and its congruence with morphology. *Amer. J. Bot.* **82**, 903-918. — Catalan, P., Kellogg, E. A. & Olmstead, R. G. 1997 Phylogeny of Poaceae subfamily Pooideae based on chloroplast *ndhF* gene sequences.

*Mol. Phylogenet. Evol.* **8**, 150-166. — Catalan, P. & Olmstead, R. G. 2000 Phylogenetic reconstruction of the genus *Brachypodium* P. Beauv. (Poaceae) from combined sequences of chloroplast *ndhF* gene and nuclear ITS. *Plant Syst. Evol.* **220**, 1-19. — Chase, M. W. and 42 others 1993 Phylogenetics of seed plants: an analysis of nucleotide sequences from the plastid gene *rbcL*. *Ann. Mo. Bot. Gard.* **80**, 528-580. — Conti, E., Fischbach, A. & Sytsma, K. J. 1993 Tribal relationships in Onagraceae - implications from *rbcL* sequence data. *Ann. Mo. Bot. Gard.* **80**, 672-685. — Dodd, M. E., Silvertown, J. & Chase, M. W. 1999 Phylogenetic analysis of trait evolution and species diversity variation among angiosperm families. *Evolution* **53**, 732-744. — Donoghue, M. J., Olmstead, R. G., Smith, J. F. & Palmer, J. D. 1992 Phylogenetic relationships of Dipsacales based on *rbcL* sequences. *Ann. Mo. Bot. Gard.* **79**, 333-345. — Downie, S. R., Katz-Downie, D. S. & Spalik, K. 2000a A phylogeny of Apiaceae tribe Scandiceae: Evidence from nuclear ribosomal DNA internal transcribed spacer sequences. *Amer. J. Bot.* **87**, 76-95. — Downie, S. R., Katz-Downie, D. S. & Watson, M. F. 2000b A phylogeny of the flowering plant family Apiaceae based on chloroplast DNA *rpl16* and *rpoC1* intron sequences: Towards a suprageneric classification of subfamily apioideae. *Amer. J. Bot.* **87**, 273-292. — Downie, S. R., Ramanath, S., Katz-Downie, D. & Llanas, E. 1998 Molecular systematics of Apiaceae subfamily Apioideae: phylogenetic analyses of nuclear ribosomal DNA internal transcribed spacer and plastid *rpoC1* intron sequences. *Amer. J. Bot.* **85**, 563-591. — Doyle, J. A. 1998 Phylogeny of vascular plants. *Annu. Rev. Ecol. Syst.* **29**, 567-599. — Doyle, J. J., Doyle, J. L., Ballenger, J. A., Dickson, E. E., Kajita, T. & Ohashi, H. 1997 A phylogeny of the chloroplast

gene *rbcL* in the Leguminosae: taxonomic correlations and insights into the evolution of nodulation. *Amer. J. Bot.* **84**, 541-554. — Dressler, R. L. 1993 *Phylogeny and Classification of the Orchid Family*. Cambridge: Cambridge University Press. — Duvall, M. R. & Morton, B. R. 1996 Molecular phylogenetics of Poaceae: an expanded analysis of *rbcL* sequence data. *Mol. Phylogenet. Evol.* **5**, 352-358. — Freudenstein, J. V. 1999 Relationships and character transformation in Pyroloideae (Ericaceae) based on ITS sequences, morphology, and development. *Syst. Bot.* **24**, 398-408. — Gielly, L. & Taberlet, P. 1996 A phylogeny of the european gentians inferred from chloroplast *trnL* (UAA) intron sequences. *Bot. J. Linn. Soc.* **120**, 57-75. — Haynes, R. R., Les, D. H. & Holm-Nielsen, L. B. 1998 Potamogetonaceae. In *The Families and Genera of Vascular Plants. IV. Flowering Plants. Monocotyledones. Alismatanae and Commelinanae (except Gramineae)* (ed. K. Kubitzki), pp 408-415. Berlin: Springer. — Hegi, G. B. 1939-1996 *Illustrierte Flora von Mitteleuropa. Vol I-VI*. Berlin, Hamburg: Paul Parey/Blackwell. — Hershkovitz, M. A. 1993 Revised circumscriptions and subgeneric taxonomies of *Calandria* and *Montiopsis* (Portulacaceae) with notes on phylogeny of the portulacaceous alliance. *Ann. Mo. Bot. Gard.* **80**, 333-365. — Jansen, R. K., Holsinger, K. E., Michaels, H. J. & Palmer, J. D. 1990 Phylogenetic analysis of chloroplast DNA restriction site data at higher taxonomic levels: an example from Asteraceae. *Evolution* **44**, 2089-2105. — Jobst, J., King, K. & Hemleben, V. 1998 Molecular evolution of the internal transcribed spacers (ITS1 and ITS2) and phylogenetic relationships among species of the family Cucurbitaceae. *Mol. Phylogenet. Evol.* **9**, 204-219. — Johansson, J. T. 1998 Chloroplast DNA restriction site mapping and the

phylogeny of *Ranunculus* (Ranunculaceae). *Plant Syst. Evol.* **213**, 1-19. — Johansson, J. T. 1999 Three large inversions in the chloroplast genomes and one loss of the chloroplast gene *rps16* suggest an early evolutionary split in the genus *Adonis* (Ranunculaceae). *Plant Syst. Evol.* **218**, 133-143. — Katz-Downie, D. S., Valiejo-Roman, C. M., Terentieva, E. I., Troitsky, A. V., Pimenov, M. G., Lee, B. & Downie, S. R. 1999 Towards a molecular phylogeny of Apiaceae subfamily Apioideae: additional information from nuclear ribosomal DNA ITS sequences. *Plant Syst. Evol.* **216**, 167-195. — Kaufmann, M. & Wink, M. 1994 Molecular systematics of the Nepetoideae (family Labiatae): phylogenetic implications from *rbcL* gene sequences. *Zeitschrift für Naturforschung* **49c**, 635-645. — Käss, E. & Wink, M. 1997b Molecular phylogeny and phylogeography of *Lupinus* (Leguminosae) inferred from nucleotide sequences of the *rbcL* gene and ITS 1 + 2 regions of rDNA. *Plant Syst. Evol.* **208**, 139-167. — Käss, E. & Wink, M. 1997a Phylogenetic relationships in the Papilionoideae (family Leguminosae) based on nucleotide sequences of cpDNA (*rbcL*) and ncDNA (ITS 1 and 2). *Mol. Phylogenet. Evol.* **8**, 65-88. — Koopman, W. M., Guetta, E., van de Wiel, C. C. M., Vosman, B. & van den Berg, R. G. 1998 Phylogenetic relationships among *Lactuca* (Asteraceae) species and related genera based on ITS-1 DNA sequences. *Amer. J. Bot.* **85**, 1517-1530. — Kron, K. A. 1997 Phylogenetic relationships of Rhododendroideae (Ericaceae). *Amer. J. Bot.* **84**, 973-980. — Kron, K. A., Fuller, R., Crayn, D. M., Gadek, P. A. & Quinn, C. J. 1999a Phylogenetic relationships of epacrids and vaccinioids (Ericaceae s. l.) based on *matK* sequence data. *Plant Syst. Evol.* **218**, 55-65. — Kron, K. A., Judd, W. S. & Crayn, D. M. 1999b Phylogenetic analyses of Andromedeae (Ericaceae

subfam. Vaccinioideae). *Amer. J. Bot.* **86**, 1290-1300. — Kubitzki, K. 1998 Systematics and Evolution. In *The Families and Genera of Vascular Plants. III. Flowering Plants. Monocotyledones. Liliaceae (except Orchidaceae)* (ed. K. Kubitzki), pp 23-34. Berlin: Springer. — Morgan, D. R., Soltis, D. E. & Robertson, K. R. 1994 Systematic and evolutionary implications of *rbcl* sequence variation in Rosaceae. *Amer. J. Bot.* **81**, 890-903. — Mummenhoff, K., Franzke, A. & Koch, M. 1997 Molecular data reveal convergence in fruit characters used in the classification of *Thlaspi* s. l. (Brassicaceae). *Bot. J. Linn. Soc.* **125**, 183-199. — Natali, A., Manen, J. F. & Ehrendorfer, F. 1995 Phylogeny of the Rubiaceae-Rubioideae, in particular the tribe Rubieae: evidence from a non-coding chloroplast DNA sequence. *Ann. Mo. Bot. Gard.* **82**, 428-439. — Pryer, K. M., Smith, A. R. & Skog, J. E. 1995 Phylogenetic relationships of extant ferns based on evidence from morphology and *rbcl* sequences. *Amer. Fern J.* **85**, 205-282. — Ro, K.-E., Keener, C. S. & McPherson, B. A. 1997 Molecular phylogenetic study of the Ranunculaceae: utility of the nuclear 26S ribosomal DNA in inferring intrafamilial relationships. *Mol. Phylogenet. Evol.* **8**, 117-127. — Soltis, D. E., Kuzoff, R. K., Conti, E., Gornall, R. & Ferguson, K. 1996 *matK* and *rbcl* gene sequence data indicate that *Saxifraga* (Saxifragaceae) is polyphyletic. *Amer. J. Bot.* **83**, 371-382. — t'Hart, H. 1991 Evolution and classification of the European *Sedum* species (Crassulaceae). *Flora Mediterranea* **2**, 31-61. — Tutin, T. G. 1964 *Vol I-V, Flora Europaea*. Cambridge University Press: Cambridge. — van Ham, R. C. H. J. & t'Hart, H. 1998 Phylogenetic relationships in the Crassulaceae inferred from chloroplast DNA restriction-site variation. *Amer. J. Bot.* **85**, 123-134. — Warwick, S. I. & Black, L. D.

1997 Phylogenetic implications of chloroplast DNA restriction site variation in subtribes Raphaninae and Cakilinae (Brassicaceae, tribe Brassiceae). *Can. J. Bot.* **75**, 960-973. — Watson, L. & Dallwitz, M. 1992 *The grass genera of the world*. Cambridge: Cambridge Univ. Press. — Wink, M. & Waterman, P. G. 1999 Chemotaxonomy in relation to molecular phylogeny of plants. In *Biochemistry of plant secondary metabolism* (ed. M. Wink), pp 300-341. Sheffield: Sheffield Academic Press and CRC Press. — Wink, N. & Kaufmann, M. 1996 Phylogenetic relationships between some members of the subfamily Lamioideae (family Labiatae) inferred from nucleotide sequences of the *rbcL* gene. *Bot. Acta* **109**, 139-148. — Zohary, M. & Heller, D. 1984 *The genus Trifolium*. Jerusalem: The Israel Academy of Sciences and Humanities. — Zunk, K., Mummenhoff, K., Koch, M. & Hurka, H. 1996 Phylogenetic relationships of *Thlaspi* s.l. (subtribe Thlaspidinae, Lepidieae) and allied genera based on chloroplast DNA restriction-site variation. *Theor. Appl. Genet.* **92**, 375-381.
